# Supplementary material for: Randomized phase II study of daily and alternate-day administration of S-1 for adjuvant chemotherapy in completely-resected stage I non-small cell lung cancer: results of the Setouchi Lung Cancer Group Study 1301
Source: Springer Nature journal article supplement (doi:10.1186/s12885-021-08232-6), 2021-05-06
Supplement: MOESM7 [file 19140660]

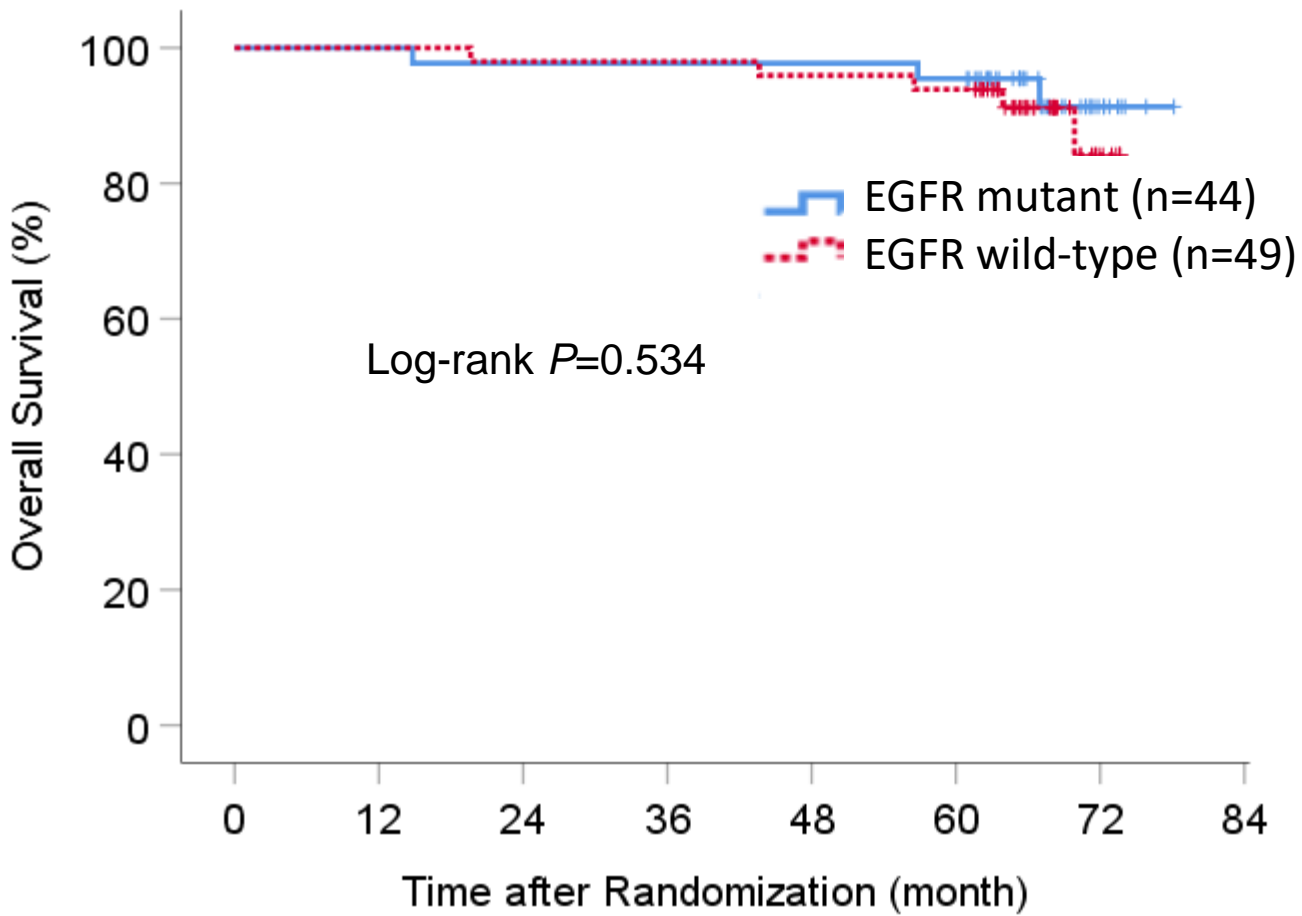

Online Resource 7. Kaplan-Meier estimates of overall survival
