# Supplementary material for: Randomized phase II study of daily and alternate-day administration of S-1 for adjuvant chemotherapy in completely-resected stage I non-small cell lung cancer: results of the Setouchi Lung Cancer Group Study 1301
Source: BMC Cancer. 2021 May 6;21:506. doi: 10.1186/s12885-021-08232-6 (PMC8101150; doi:10.1186/s12885-021-08232-6)
Supplement: Supplementary file 6 — Additional file 6. Online resourse 6. Follow-up assessment. [file 12885_2021_8232_MOESM6_ESM.xlsm]

## Sheet: Sheet1
Online resourse 6. Follow-up assessment
Examination	During the protocol treatment	~2 years after the initiation of protocol treatment	3 years ~ 5years after the initiation of protocol treatment
Physical examination ECOG-PS Blood counts Biochemical examination	bi-weekly	every 3 months	every 6 months
Tumor markers	monthly	every 3 months	every 6 months
Chest X-ray	bi-monthly	every 3 months	every 6 months
Chest CT	every 6 months	every 6 months	every 6 or 12 months
			PS: Performance status, CT: Computed tomography
